# Supplementary material for: Test-retest reliability for common tasks in vision science
Source: PubMed Central journal article supplement (PMC9344221; doi:10.1167/jov.22.8.18), 2022-07-29
Supplement: jovi-22-8-18_s001.pdf [file jovi-22-8-18_s001.pdf]

## Supplementary Material A

*Note.* Because of the limited number of male participants, the ICC values for males are not especially precise. The high male ICC for UFOV Inner Accuracy may be anomaly that would not hold true for a larger sample.

| Task Measure               | Gender (N)   | Session 1<br>M (SD) | Session 2<br>M (SD) | ICC  | Main Effect<br>(Session)                                  | Session x Gender                                         | Main Effect<br>(Gender)                                  | Levene's<br>Session 1             | Levene's<br>Session 2              |
|----------------------------|--------------|---------------------|---------------------|------|-----------------------------------------------------------|----------------------------------------------------------|----------------------------------------------------------|-----------------------------------|------------------------------------|
| MoCo<br>Threshold          | Male (19)    | 0.27 (0.11)         | 0.27 (0.13)         | 0.66 | $F(1, 139) = 0.14,$<br>$\eta^2_p = 0.00,$<br>$p = 0.71$   | $F(1, 139) = 0.02,$<br>$\eta^2_p = 0.00,$<br>$p = 0.88$  | $F(1, 139) = 0.51,$<br>$\eta^2_p = 0.00,$<br>$p = 0.48$  | $F(1, 139) = 0.09,$<br>$p = 0.77$ | $F(1, 139) = 2.69,$<br>$p = 0.10$  |
|                            | Female (122) | 0.29 (0.11)         | 0.28 (0.09)         | 0.59 |                                                           |                                                          |                                                          |                                   |                                    |
| UFOV<br>Number<br>Accuracy | Male (19)    | 0.94 (0.06)         | 0.96 (0.03)         | 0.21 | $F(1, 135) = 6.25,$<br>$\eta^2_p = 0.04,$<br>$p = 0.01$   | $F(1, 135) = 0.24,$<br>$\eta^2_p = 0.00,$<br>$p = 0.63$  | $F(1, 135) = 0.02,$<br>$\eta^2_p = 0.00,$<br>$p = 0.90$  | $F(1, 135) = 0.33,$<br>$p = 0.57$ | $F(1, 135) = 1.01,$<br>$p = 0.32$  |
|                            | Female (118) | 0.94 (0.06)         | 0.96 (0.05)         | 0.52 |                                                           |                                                          |                                                          |                                   |                                    |
| UFOV Inner<br>Accuracy     | Male (19)    | 0.86 (0.21)         | 0.95 (0.12)         | 0.73 | $F(1, 135) = 21.48,$<br>$\eta^2_p = 0.14,$<br>$p < .001$  | $F(1, 135) = 0.81,$<br>$\eta^2_p = 0.01,$<br>$p = 0.37$  | $F(1, 135) = 2.61,$<br>$\eta^2_p = 0.02,$<br>$p = 0.11,$ | $F(1, 135) = 1.09,$<br>$p = 0.30$ | $F(1, 135) = 1.41,$<br>$p = 0.24$  |
|                            | Female (118) | 0.78 (0.18)         | 0.91 (0.17)         | 0.30 |                                                           |                                                          |                                                          |                                   |                                    |
| UFOV<br>Middle<br>Accuracy | Male (19)    | 0.26 (0.18)         | 0.32 (0.21)         | 0.75 | $F(1, 135) = 10.65,$<br>$\eta^2_p = 0.07,$<br>$p = 0.001$ | $F(1, 135) = 0.001,$<br>$\eta^2_p = 0.00,$<br>$p = 0.97$ | $F(1, 135) = 0.36,$<br>$\eta^2_p = 0.00,$<br>$p = 0.55$  | $F(1, 135) = 0.07,$<br>$p = 0.80$ | $F(1, 135) = 0.01,$<br>$p = 0.95$  |
|                            | Female (118) | 0.23 (0.17)         | 0.30 (0.20)         | 0.58 |                                                           |                                                          |                                                          |                                   |                                    |
| UFOV Outer<br>Accuracy     | Male (19)    | 0.18 (0.13)         | 0.24 (0.18)         | 0.69 | $F(1, 135) = 9.54,$<br>$\eta^2_p = 0.07,$<br>$p = 0.002$  | $F(1, 135) = 3.44,$<br>$\eta^2_p = 0.03,$<br>$p = 0.07$  | $F(1, 135) = 7.29,$<br>$\eta^2_p = 0.05,$<br>$p = 0.01$  | $F(1, 135) = 0.65,$<br>$p = 0.42$ | $F(1, 135) = 3.16,$<br>$p = 0.08$  |
|                            | Female (118) | 0.12 (0.12)         | 0.14 (0.14)         | 0.75 |                                                           |                                                          |                                                          |                                   |                                    |
| MOT Max<br>Items           | Male (21)    | 6.14 (0.65)         | 6.14 (0.73)         | 0.39 | $F(1, 140) = 0.002,$<br>$\eta^2_p = 0.00,$<br>$p = 0.96$  | $F(1, 140) = 0.002,$<br>$\eta^2_p = 0.00,$<br>$p = 0.96$ | $F(1, 140) = 3.84,$<br>$\eta^2_p = 0.03,$<br>$p = 0.05$  | $F(1, 140) = 0.25,$<br>$p = 0.62$ | $F(1, 140) = 2.67,$<br>$p = 0.11$  |
|                            | Female (121) | 5.89 (0.66)         | 5.90 (0.60)         | 0.40 |                                                           |                                                          |                                                          |                                   |                                    |
| MOT<br>Threshold           | Male (21)    | 4.88 (0.59)         | 4.79 (1.03)         | 0.25 | $F(1, 140) = 0.21,$<br>$\eta^2_p = 0.00,$<br>$p = 0.65$   | $F(1, 140) = 0.25,$<br>$\eta^2_p = 0.00,$<br>$p = 0.62$  | $F(1, 140) = 8.98,$<br>$\eta^2_p = 0.06,$<br>$p = 0.003$ | $F(1, 140) = 1.94,$<br>$p = 0.17$ | $F(1, 140) = 6.22,$<br>$p = 0.014$ |
|                            | Female (121) | 4.41 (0.66)         | 4.47 (0.74)         | 0.35 |                                                           |                                                          |                                                          |                                   |                                    |
| VWM<br>Capacity (k)        | Male (19)    | 2.44 (0.83)         | 2.34 (1.00)         | 0.80 | $F(1, 135) = 0.04,$<br>$\eta^2_p = 0.00,$<br>$p = 0.85$   | $F(1, 135) = 1.70,$<br>$\eta^2_p = 0.01,$<br>$p = 0.19$  | $F(1, 135) = 0.02,$<br>$\eta^2_p = 0.00,$<br>$p = 0.88$  | $F(1, 135) = 0.83,$<br>$p = 0.36$ | $F(1, 135) = 1.65,$<br>$p = 0.20$  |
|                            | Female (118) | 2.33 (0.75)         | 2.40 (0.80)         | 0.77 |                                                           |                                                          |                                                          |                                   |                                    |
